# Supplementary material for: Safety and efficacy of ferric citrate in patients with nondialysis-dependent chronic kidney disease
Source: PubMed Central journal article supplement (PMC5706696; doi:10.1371/journal.pone.0188712), 2017-11-29
Supplement: pone.0188712.s002.pdf [file pone.0188712.s002.pdf]

Table 3.12  
Number and Percent of Subjects with Treatment-Emergent Adverse Events  
by System Organ Class, Preferred Term, and Time to Onset  
Pooled Safety Population

| System Organ Class<br>Preferred Term | Time to Onset<br>(weeks) | All<br>KRX-0502 [1]<br>(N=301)<br>n(%) | Double-Blind<br>KRX-0502<br>(N=190)<br>n(%) | Double-Blind<br>Placebo<br>(N=188)<br>n(%) |
|--------------------------------------|--------------------------|----------------------------------------|---------------------------------------------|--------------------------------------------|
| GASTROINTESTINAL DISORDERS           | >0 - 4                   | 98 ( 32.6)                             | 64 ( 33.7)                                  | 30 ( 16.0)                                 |
|                                      | >4 - 8                   | 42 ( 15.0)                             | 32 ( 18.2)                                  | 18 ( 11.1)                                 |
|                                      | >8 - 12                  | 13 ( 6.5)                              | 12 ( 7.3)                                   | 8 ( 5.3)                                   |
|                                      | >12 - 16                 | 14 ( 10.6)                             | 14 ( 10.5)                                  | 8 ( 6.3)                                   |
|                                      | >16 - 20                 | 6 ( 6.9)                               | 0                                           | 0                                          |
|                                      | >20                      | 5 ( 6.0)                               | 0                                           | 0                                          |
| DIARRHOEA                            | >0 - 4                   | 34 ( 11.3)                             | 24 ( 12.6)                                  | 13 ( 6.9)                                  |
|                                      | >4 - 8                   | 17 ( 6.1)                              | 11 ( 6.3)                                   | 6 ( 3.7)                                   |
|                                      | >8 - 12                  | 6 ( 3.0)                               | 5 ( 3.0)                                    | 4 ( 2.7)                                   |
|                                      | >12 - 16                 | 6 ( 4.5)                               | 6 ( 4.5)                                    | 2 ( 1.6)                                   |
|                                      | >16 - 20                 | 3 ( 3.4)                               | 0                                           | 0                                          |
|                                      | >20                      | 0                                      | 0                                           | 0                                          |
| FAECES DISCOLOURED                   | >0 - 4                   | 52 ( 17.3)                             | 35 ( 18.4)                                  | 0                                          |
|                                      | >4 - 8                   | 3 ( 1.1)                               | 2 ( 1.1)                                    | 0                                          |
|                                      | >8 - 12                  | 3 ( 1.5)                               | 3 ( 1.8)                                    | 0                                          |
|                                      | >12 - 16                 | 1 ( 0.8)                               | 1 ( 0.8)                                    | 0                                          |
|                                      | >16 - 20                 | 0                                      | 0                                           | 0                                          |
|                                      | >20                      | 0                                      | 0                                           | 0                                          |

Note: Adverse events are coded using MedDRA version 17.0. For each system organ class and preferred term, a subject is counted once within each of the intervals in which the event occurred. The number of subjects treated in the interval is the denominator for the percentages.

[1] Includes Study KRX-0502-306 and Study KRX-0502-204 double-blind KRX-0502, Study KRX-0502-306 open-label extension period, and open-label Study KRX-0502-207.

[2] TEAEs are defined as adverse events occurring or worsening in severity after the first dose of study drug.
