# Supplementary material for: Safety and efficacy of ferric citrate in patients with nondialysis-dependent chronic kidney disease
Source: PubMed Central journal article supplement (PMC5706696; doi:10.1371/journal.pone.0188712), 2017-11-29
Supplement: pone.0188712.s003.pdf [file pone.0188712.s003.pdf]

Table 1.1  
 Mixed Model Repeated Measures (MMRM) of Change in Hemoglobin (g/dL) from Baseline over Time During Double-Blind Period  
 Studies KRX-0502-306 and KRX-0502-204

|                             | KRX-0502        | Placebo          | Difference<br>(KRX-0502 - Placebo) |
|-----------------------------|-----------------|------------------|------------------------------------|
| Week 1 Change from Baseline |                 |                  |                                    |
| n                           | 180             | 171              |                                    |
| LS Mean (SE)                | -0.05 (0.055)   | -0.12 (0.056)    | 0.07 (0.077)                       |
| 95% Confidence Interval     | (-0.154, 0.061) | (-0.227, -0.007) | (-0.081, 0.223)                    |
| Treatment p-value           |                 |                  | 0.361                              |
| Week 2 Change from Baseline |                 |                  |                                    |
| n                           | 180             | 164              |                                    |
| LS Mean (SE)                | 0.05 (0.055)    | -0.17 (0.057)    | 0.22 (0.078)                       |
| 95% Confidence Interval     | (-0.058, 0.157) | (-0.284, -0.061) | (0.068, 0.375)                     |
| Treatment p-value           |                 |                  | 0.005                              |
| Week 4 Change from Baseline |                 |                  |                                    |
| n                           | 171             | 158              |                                    |
| LS Mean (SE)                | 0.19 (0.056)    | -0.19 (0.057)    | 0.37 (0.079)                       |
| 95% Confidence Interval     | (0.076, 0.295)  | (-0.300, -0.074) | (0.217, 0.528)                     |
| Treatment p-value           |                 |                  | <0.001                             |
| Week 6 Change from Baseline |                 |                  |                                    |
| n                           | 160             | 151              |                                    |
| LS Mean (SE)                | 0.27 (0.057)    | -0.18 (0.058)    | 0.45 (0.081)                       |
| 95% Confidence Interval     | (0.163, 0.386)  | (-0.293, -0.065) | (0.295, 0.612)                     |
| Treatment p-value           |                 |                  | <0.001                             |

Note: By visit results are from a mixed model repeated measures (MMRM) analysis using restricted maximum likelihood (REML) with treatment (KRX-0502 versus placebo), study, visit, and treatment-by-visit interaction as fixed effects, baseline as a covariate, and subject as a random effect. Study-by-treatment interaction p-value was obtained from the same model with the addition of the study-by-treatment interaction term.

Table 1.1  
 Mixed Model Repeated Measures (MMRM) of Change in Hemoglobin (g/dL) from Baseline over Time During Double-Blind Period  
 Studies KRX-0502-306 and KRX-0502-204

|                              | KRX-0502       | Placebo          | Difference<br>(KRX-0502 - Placebo) |
|------------------------------|----------------|------------------|------------------------------------|
| Week 8 Change from Baseline  |                |                  |                                    |
| n                            | 156            | 140              |                                    |
| LS Mean (SE)                 | 0.41 (0.057)   | -0.14 (0.060)    | 0.55 (0.082)                       |
| 95% Confidence Interval      | (0.298, 0.523) | (-0.261, -0.027) | (0.394, 0.715)                     |
| Treatment p-value            |                |                  | <0.001                             |
| Week 10 Change from Baseline |                |                  |                                    |
| n                            | 152            | 137              |                                    |
| LS Mean (SE)                 | 0.47 (0.058)   | -0.18 (0.060)    | 0.65 (0.083)                       |
| 95% Confidence Interval      | (0.359, 0.586) | (-0.297, -0.062) | (0.490, 0.814)                     |
| Treatment p-value            |                |                  | <0.001                             |
| Week 12 Change from Baseline |                |                  |                                    |
| n                            | 158            | 150              |                                    |
| LS Mean (SE)                 | 0.50 (0.057)   | -0.17 (0.058)    | 0.67 (0.081)                       |
| 95% Confidence Interval      | (0.389, 0.612) | (-0.284, -0.055) | (0.512, 0.829)                     |
| Treatment p-value            |                |                  | <0.001                             |
| Week 14 Change from Baseline |                |                  |                                    |
| n                            | 91             | 86               |                                    |
| LS Mean (SE)                 | 0.63 (0.068)   | -0.16 (0.070)    | 0.79 (0.097)                       |
| 95% Confidence Interval      | (0.499, 0.767) | (-0.298, -0.023) | (0.603, 0.983)                     |
| Treatment p-value            |                |                  | <0.001                             |

Note: By visit results are from a mixed model repeated measures (MMRM) analysis using restricted maximum likelihood (REML) with treatment (KRX-0502 versus placebo), study, visit, and treatment-by-visit interaction as fixed effects, baseline as a covariate, and subject as a random effect. Study-by-treatment interaction p-value was obtained from the same model with the addition of the study-by-treatment interaction term.

Table 1.1  
 Mixed Model Repeated Measures (MMRM) of Change in Hemoglobin (g/dL) from Baseline over Time During Double-Blind Period  
 Studies KRX-0502-306 and KRX-0502-204

|                              | KRX-0502       | Placebo         | Difference<br>(KRX-0502 - Placebo) |
|------------------------------|----------------|-----------------|------------------------------------|
| Week 16 Change from Baseline |                |                 |                                    |
| n                            | 86             | 77              |                                    |
| LS Mean (SE)                 | 0.77 (0.070)   | -0.08 (0.073)   | 0.86 (0.100)                       |
| 95% Confidence Interval      | (0.637, 0.911) | (-0.224, 0.062) | (0.660, 1.051)                     |
| Treatment p-value            |                |                 | <0.001                             |

Study-by-treatment interaction p-value = 0.624

Note: By visit results are from a mixed model repeated measures (MMRM) analysis using restricted maximum likelihood (REML) with treatment (KRX-0502 versus placebo), study, visit, and treatment-by-visit interaction as fixed effects, baseline as a covariate, and subject as a random effect. Study-by-treatment interaction p-value was obtained from the same model with the addition of the study-by-treatment interaction term.
