# Supplementary material for: Safety and efficacy of ferric citrate in patients with nondialysis-dependent chronic kidney disease
Source: PubMed Central journal article supplement (PMC5706696; doi:10.1371/journal.pone.0188712), 2017-11-29
Supplement: pone.0188712.s004.pdf [file pone.0188712.s004.pdf]

Table 1.2  
 Mixed Model Repeated Measures (MMRM) of Change in Iron Study Parameters from Baseline over Time During Double-Blind Period  
 Studies KRX-0502-306 and KRX-0502-204

Transferrin Saturation (%)

|                             | KRX-0502       | Placebo          | Difference<br>(KRX-0502 - Placebo) |
|-----------------------------|----------------|------------------|------------------------------------|
| Week 1 Change from Baseline |                |                  |                                    |
| n                           | 176            | 171              |                                    |
| LS Mean (SE)                | 3.78 (0.758)   | -1.33 (0.768)    | 5.11 (1.071)                       |
| 95% Confidence Interval     | (2.298, 5.270) | (-2.832, 0.180)  | (3.009, 7.212)                     |
| Treatment p-value           |                |                  | <0.001                             |
| Week 2 Change from Baseline |                |                  |                                    |
| n                           | 179            | 161              |                                    |
| LS Mean (SE)                | 5.39 (0.752)   | -0.89 (0.789)    | 6.28 (1.083)                       |
| 95% Confidence Interval     | (3.910, 6.861) | (-2.439, 0.654)  | (4.155, 8.401)                     |
| Treatment p-value           |                |                  | <0.001                             |
| Week 4 Change from Baseline |                |                  |                                    |
| n                           | 170            | 158              |                                    |
| LS Mean (SE)                | 5.96 (0.770)   | -1.27 (0.796)    | 7.23 (1.100)                       |
| 95% Confidence Interval     | (4.449, 7.470) | (-2.828, 0.295)  | (5.069, 9.384)                     |
| Treatment p-value           |                |                  | <0.001                             |
| Week 6 Change from Baseline |                |                  |                                    |
| n                           | 159            | 147              |                                    |
| LS Mean (SE)                | 7.04 (0.792)   | -1.75 (0.820)    | 8.79 (1.133)                       |
| 95% Confidence Interval     | (5.482, 8.588) | (-3.359, -0.142) | (6.563, 11.008)                    |
| Treatment p-value           |                |                  | <0.001                             |

Note: By visit results are from a mixed model repeated measures (MMRM) analysis using restricted maximum likelihood (REML) with treatment (KRX-0502 versus placebo), study, visit, and treatment-by-visit interaction as fixed effects, baseline as a covariate, and subject as a random effect. Study-by-treatment interaction p-value was obtained from the same model with the addition of the study-by-treatment interaction term.

Table 1.2  
 Mixed Model Repeated Measures (MMRM) of Change in Iron Study Parameters from Baseline over Time During Double-Blind Period  
 Studies KRX-0502-306 and KRX-0502-204

Transferrin Saturation (%)

|                              | KRX-0502         | Placebo         | Difference<br>(KRX-0502 - Placebo) |
|------------------------------|------------------|-----------------|------------------------------------|
| Week 8 Change from Baseline  |                  |                 |                                    |
| n                            | 155              | 140             |                                    |
| LS Mean (SE)                 | 9.29 (0.800)     | -1.39 (0.838)   | 10.69 (1.152)                      |
| 95% Confidence Interval      | (7.725, 10.864)  | (-3.036, 0.252) | (8.427, 12.945)                    |
| Treatment p-value            |                  |                 | <0.001                             |
| Week 10 Change from Baseline |                  |                 |                                    |
| n                            | 147              | 138             |                                    |
| LS Mean (SE)                 | 12.33 (0.817)    | -1.25 (0.843)   | 13.57 (1.168)                      |
| 95% Confidence Interval      | (10.723, 13.929) | (-2.901, 0.406) | (11.283, 15.863)                   |
| Treatment p-value            |                  |                 | <0.001                             |
| Week 12 Change from Baseline |                  |                 |                                    |
| n                            | 156              | 151             |                                    |
| LS Mean (SE)                 | 12.28 (0.796)    | -1.56 (0.808)   | 13.84 (1.130)                      |
| 95% Confidence Interval      | (10.721, 13.842) | (-3.140, 0.030) | (11.621, 16.053)                   |
| Treatment p-value            |                  |                 | <0.001                             |
| Week 14 Change from Baseline |                  |                 |                                    |
| n                            | 90               | 86              |                                    |
| LS Mean (SE)                 | 15.14 (1.016)    | -1.49 (1.039)   | 16.63 (1.436)                      |
| 95% Confidence Interval      | (13.145, 17.130) | (-3.527, 0.548) | (13.811, 19.443)                   |
| Treatment p-value            |                  |                 | <0.001                             |

Note: By visit results are from a mixed model repeated measures (MMRM) analysis using restricted maximum likelihood (REML) with treatment (KRX-0502 versus placebo), study, visit, and treatment-by-visit interaction as fixed effects, baseline as a covariate, and subject as a random effect. Study-by-treatment interaction p-value was obtained from the same model with the addition of the study-by-treatment interaction term.

Table 1.2  
 Mixed Model Repeated Measures (MMRM) of Change in Iron Study Parameters from Baseline over Time During Double-Blind Period  
 Studies KRX-0502-306 and KRX-0502-204

Transferrin Saturation (%)

|                              | KRX-0502         | Placebo         | Difference<br>(KRX-0502 - Placebo) |
|------------------------------|------------------|-----------------|------------------------------------|
| Week 16 Change from Baseline |                  |                 |                                    |
| n                            | 79               | 80              |                                    |
| LS Mean (SE)                 | 15.76 (1.075)    | -0.44 (1.072)   | 16.20 (1.502)                      |
| 95% Confidence Interval      | (13.650, 17.866) | (-2.540, 1.664) | (13.252, 19.141)                   |
| Treatment p-value            |                  |                 | <0.001                             |

Study-by-treatment interaction p-value = 0.055

Note: By visit results are from a mixed model repeated measures (MMRM) analysis using restricted maximum likelihood (REML) with treatment (KRX-0502 versus placebo), study, visit, and treatment-by-visit interaction as fixed effects, baseline as a covariate, and subject as a random effect. Study-by-treatment interaction p-value was obtained from the same model with the addition of the study-by-treatment interaction term.

Table 1.2  
 Mixed Model Repeated Measures (MMRM) of Change in Iron Study Parameters from Baseline over Time During Double-Blind Period  
 Studies KRX-0502-306 and KRX-0502-204

Ferritin (ng/mL)

|                             | KRX-0502         | Placebo          | Difference<br>(KRX-0502 - Placebo) |
|-----------------------------|------------------|------------------|------------------------------------|
| Week 1 Change from Baseline |                  |                  |                                    |
| n                           | 178              | 172              |                                    |
| LS Mean (SE)                | 3.91 (3.617)     | -3.27 (3.669)    | 7.18 (5.098)                       |
| 95% Confidence Interval     | (-3.189, 11.006) | (-10.471, 3.927) | (-2.821, 17.182)                   |
| Treatment p-value           |                  |                  | 0.159                              |
| Week 2 Change from Baseline |                  |                  |                                    |
| n                           | 180              | 163              |                                    |
| LS Mean (SE)                | 10.41 (3.606)    | -3.99 (3.742)    | 14.39 (5.143)                      |
| 95% Confidence Interval     | (3.330, 17.481)  | (-11.328, 3.355) | (4.302, 24.482)                    |
| Treatment p-value           |                  |                  | 0.005                              |
| Week 4 Change from Baseline |                  |                  |                                    |
| n                           | 171              | 158              |                                    |
| LS Mean (SE)                | 19.62 (3.672)    | -2.13 (3.788)    | 21.75 (5.223)                      |
| 95% Confidence Interval     | (12.414, 26.824) | (-9.559, 5.303)  | (11.500, 31.994)                   |
| Treatment p-value           |                  |                  | <0.001                             |
| Week 6 Change from Baseline |                  |                  |                                    |
| n                           | 162              | 152              |                                    |
| LS Mean (SE)                | 32.57 (3.739)    | -6.29 (3.836)    | 38.86 (5.306)                      |
| 95% Confidence Interval     | (25.240, 39.910) | (-13.814, 1.239) | (28.453, 49.272)                   |
| Treatment p-value           |                  |                  | <0.001                             |

Note: By visit results are from a mixed model repeated measures (MMRM) analysis using restricted maximum likelihood (REML) with treatment (KRX-0502 versus placebo), study, visit, and treatment-by-visit interaction as fixed effects, baseline as a covariate, and subject as a random effect. Study-by-treatment interaction p-value was obtained from the same model with the addition of the study-by-treatment interaction term.

Table 1.2  
 Mixed Model Repeated Measures (MMRM) of Change in Iron Study Parameters from Baseline over Time During Double-Blind Period  
 Studies KRX-0502-306 and KRX-0502-204

|                              | Ferritin (ng/mL)   |                   |                                    |
|------------------------------|--------------------|-------------------|------------------------------------|
|                              | KRX-0502           | Placebo           | Difference<br>(KRX-0502 - Placebo) |
| Week 8 Change from Baseline  |                    |                   |                                    |
| n                            | 156                | 141               |                                    |
| LS Mean (SE)                 | 45.40 (3.785)      | -8.09 (3.935)     | 53.49 (5.409)                      |
| 95% Confidence Interval      | (37.975, 52.825)   | (-15.805, -0.366) | (42.876, 64.097)                   |
| Treatment p-value            |                    |                   | <0.001                             |
| Week 10 Change from Baseline |                    |                   |                                    |
| n                            | 152                | 138               |                                    |
| LS Mean (SE)                 | 69.93 (3.816)      | -6.45 (3.962)     | 76.38 (5.451)                      |
| 95% Confidence Interval      | (62.441, 77.414)   | (-14.221, 1.322)  | (65.684, 87.071)                   |
| Treatment p-value            |                    |                   | <0.001                             |
| Week 12 Change from Baseline |                    |                   |                                    |
| n                            | 159                | 151               |                                    |
| LS Mean (SE)                 | 93.79 (3.751)      | -5.87 (3.826)     | 99.66 (5.321)                      |
| 95% Confidence Interval      | (86.432, 101.152)  | (-13.377, 1.637)  | (89.224, 110.100)                  |
| Treatment p-value            |                    |                   | <0.001                             |
| Week 14 Change from Baseline |                    |                   |                                    |
| n                            | 92                 | 86                |                                    |
| LS Mean (SE)                 | 116.23 (4.561)     | -9.72 (4.696)     | 125.94 (6.468)                     |
| 95% Confidence Interval      | (107.285, 125.174) | (-18.925, -0.505) | (113.260, 138.630)                 |
| Treatment p-value            |                    |                   | <0.001                             |

Note: By visit results are from a mixed model repeated measures (MMRM) analysis using restricted maximum likelihood (REML) with treatment (KRX-0502 versus placebo), study, visit, and treatment-by-visit interaction as fixed effects, baseline as a covariate, and subject as a random effect. Study-by-treatment interaction p-value was obtained from the same model with the addition of the study-by-treatment interaction term.

Table 1.2  
 Mixed Model Repeated Measures (MMRM) of Change in Iron Study Parameters from Baseline over Time During Double-Blind Period  
 Studies KRX-0502-306 and KRX-0502-204

|                              | Ferritin (ng/mL)   |                  |                                    |
|------------------------------|--------------------|------------------|------------------------------------|
|                              | KRX-0502           | Placebo          | Difference<br>(KRX-0502 - Placebo) |
| Week 16 Change from Baseline |                    |                  |                                    |
| n                            | 86                 | 81               |                                    |
| LS Mean (SE)                 | 148.14 (4.673)     | -7.94 (4.800)    | 156.08 (6.623)                     |
| 95% Confidence Interval      | (138.973, 157.304) | (-17.351, 1.476) | (143.088, 169.065)                 |
| Treatment p-value            |                    |                  | <0.001                             |

Study-by-treatment interaction p-value = 0.076

Note: By visit results are from a mixed model repeated measures (MMRM) analysis using restricted maximum likelihood (REML) with treatment (KRX-0502 versus placebo), study, visit, and treatment-by-visit interaction as fixed effects, baseline as a covariate, and subject as a random effect. Study-by-treatment interaction p-value was obtained from the same model with the addition of the study-by-treatment interaction term.
