# Supplementary material for: Safety and efficacy of ferric citrate in patients with nondialysis-dependent chronic kidney disease
Source: PubMed Central journal article supplement (PMC5706696; doi:10.1371/journal.pone.0188712), 2017-11-29
Supplement: pone.0188712.s005.pdf [file pone.0188712.s005.pdf]

WCN Abstract

Mixed Model Repeated Measures (MMRM) of Change in Serum Chemistry Parameters from Baseline over Time During Double-Blind Period  
 Studies KRX-0502-306 and KRX-0502-204

Phosphate (mg/dL)

|                             | KRX-0502         | Placebo          | Difference<br>(KRX-0502 - Placebo) |
|-----------------------------|------------------|------------------|------------------------------------|
| Week 1 Change from Baseline |                  |                  |                                    |
| n                           | 180              | 172              |                                    |
| LS Mean (SE)                | -0.25 (0.044)    | -0.08 (0.045)    | -0.17 (0.062)                      |
| 95% Confidence Interval     | (-0.336, -0.165) | (-0.167, 0.008)  | (-0.292, -0.050)                   |
| Treatment p-value           |                  |                  | 0.006                              |
| Week 2 Change from Baseline |                  |                  |                                    |
| n                           | 181              | 165              |                                    |
| LS Mean (SE)                | -0.28 (0.044)    | -0.05 (0.045)    | -0.22 (0.062)                      |
| 95% Confidence Interval     | (-0.361, -0.190) | (-0.144, 0.034)  | (-0.343, -0.098)                   |
| Treatment p-value           |                  |                  | <0.001                             |
| Week 4 Change from Baseline |                  |                  |                                    |
| n                           | 172              | 158              |                                    |
| LS Mean (SE)                | -0.31 (0.045)    | -0.05 (0.046)    | -0.27 (0.064)                      |
| 95% Confidence Interval     | (-0.402, -0.227) | (-0.139, 0.042)  | (-0.391, -0.141)                   |
| Treatment p-value           |                  |                  | <0.001                             |
| Week 6 Change from Baseline |                  |                  |                                    |
| n                           | 162              | 151              |                                    |
| LS Mean (SE)                | -0.35 (0.046)    | -0.19 (0.047)    | -0.17 (0.065)                      |
| 95% Confidence Interval     | (-0.441, -0.262) | (-0.277, -0.093) | (-0.294, -0.039)                   |
| Treatment p-value           |                  |                  | 0.011                              |

Note: By visit results are from a mixed model repeated measures (MMRM) analysis using restricted maximum likelihood (REML) with treatment (KRX-0502 versus placebo), study, visit, and treatment-by-visit interaction as fixed effects, baseline as a covariate, and subject as a random effect. Study-by-treatment interaction p-value was obtained from the same model with the addition of the study-by-treatment interaction term.

WCN Abstract

Mixed Model Repeated Measures (MMRM) of Change in Serum Chemistry Parameters from Baseline over Time During Double-Blind Period  
 Studies KRX-0502-306 and KRX-0502-204

Phosphate (mg/dL)

|                              | KRX-0502         | Placebo          | Difference<br>(KRX-0502 - Placebo) |
|------------------------------|------------------|------------------|------------------------------------|
| Week 8 Change from Baseline  |                  |                  |                                    |
| n                            | 156              | 141              |                                    |
| LS Mean (SE)                 | -0.38 (0.046)    | -0.18 (0.048)    | -0.21 (0.066)                      |
| 95% Confidence Interval      | (-0.474, -0.292) | (-0.273, -0.083) | (-0.335, -0.075)                   |
| Treatment p-value            |                  |                  | 0.002                              |
| Week 10 Change from Baseline |                  |                  |                                    |
| n                            | 151              | 138              |                                    |
| LS Mean (SE)                 | -0.42 (0.047)    | -0.15 (0.049)    | -0.28 (0.067)                      |
| 95% Confidence Interval      | (-0.514, -0.330) | (-0.242, -0.051) | (-0.407, -0.144)                   |
| Treatment p-value            |                  |                  | <0.001                             |
| Week 12 Change from Baseline |                  |                  |                                    |
| n                            | 159              | 151              |                                    |
| LS Mean (SE)                 | -0.42 (0.046)    | -0.15 (0.047)    | -0.27 (0.065)                      |
| 95% Confidence Interval      | (-0.514, -0.335) | (-0.246, -0.063) | (-0.398, -0.142)                   |
| Treatment p-value            |                  |                  | <0.001                             |
| Week 14 Change from Baseline |                  |                  |                                    |
| n                            | 92               | 86               |                                    |
| LS Mean (SE)                 | -0.48 (0.057)    | -0.18 (0.059)    | -0.31 (0.082)                      |
| 95% Confidence Interval      | (-0.597, -0.372) | (-0.293, -0.060) | (-0.468, -0.148)                   |
| Treatment p-value            |                  |                  | <0.001                             |

Note: By visit results are from a mixed model repeated measures (MMRM) analysis using restricted maximum likelihood (REML) with treatment (KRX-0502 versus placebo), study, visit, and treatment-by-visit interaction as fixed effects, baseline as a covariate, and subject as a random effect. Study-by-treatment interaction p-value was obtained from the same model with the addition of the study-by-treatment interaction term.

WCN Abstract

Mixed Model Repeated Measures (MMRM) of Change in Serum Chemistry Parameters from Baseline over Time During Double-Blind Period  
Studies KRX-0502-306 and KRX-0502-204

Phosphate (mg/dL)

|                              | KRX-0502         | Placebo          | Difference<br>(KRX-0502 - Placebo) |
|------------------------------|------------------|------------------|------------------------------------|
| Week 16 Change from Baseline |                  |                  |                                    |
| n                            | 86               | 81               |                                    |
| LS Mean (SE)                 | -0.52 (0.059)    | -0.22 (0.061)    | -0.30 (0.084)                      |
| 95% Confidence Interval      | (-0.637, -0.405) | (-0.341, -0.102) | (-0.464, -0.135)                   |
| Treatment p-value            |                  |                  | <0.001                             |

Study-by-treatment interaction p-value = <.001

Note: By visit results are from a mixed model repeated measures (MMRM) analysis using restricted maximum likelihood (REML) with treatment (KRX-0502 versus placebo), study, visit, and treatment-by-visit interaction as fixed effects, baseline as a covariate, and subject as a random effect. Study-by-treatment interaction p-value was obtained from the same model with the addition of the study-by-treatment interaction term.
